# Supplementary material
Source: publisher figshare collection journal article supplement (https://acs.figshare.com/ndownloader/files/4040740)
Supplement: Supplementary file 1 [file 4040740]

# Shear Stress and its Effect on the Interaction of Myoblast Cells with Nano-Sized Drug Delivery Vehicles

*Leticia Hosta-Rigau<sup>1</sup> and Brigitte Städler<sup>1\*</sup>*

<sup>1</sup> iNANO Interdisciplinary Nanoscience Centre, Aarhus University, Denmark

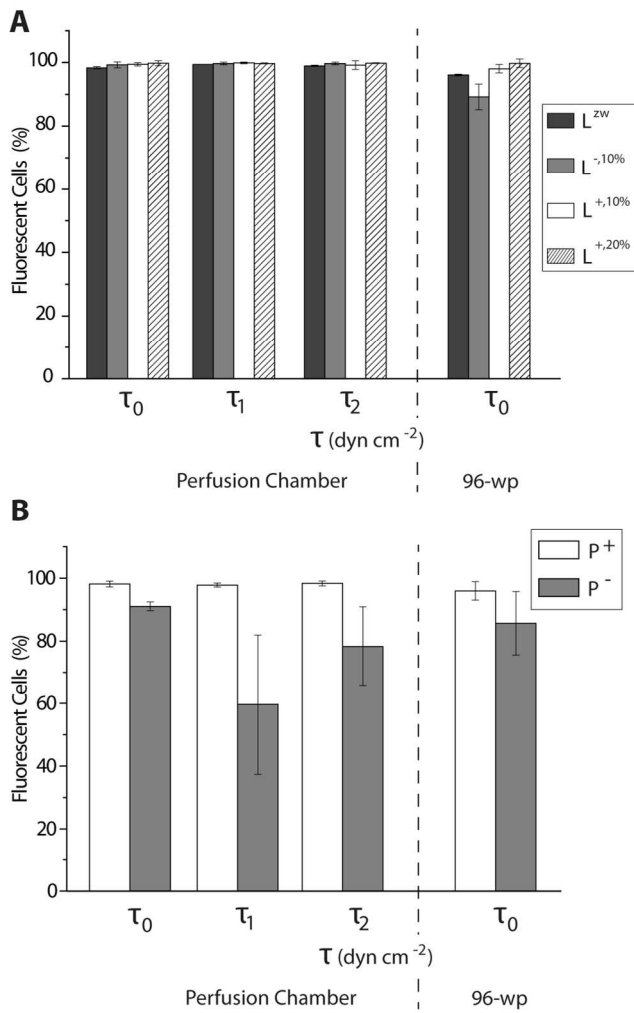

**Figure S1.** a) The percentage of fluorescent myoblast cells associated with nitrobenzoxadiazole labeled liposomes containing either only zwitterionic lipids ( $L^{zw}$ , dark gray bars) or 10 wt% negatively charged lipids ( $L^{-,10\%}$ , light gray bars) or 10 wt% and 20 wt% positively charged lipids ( $L^{+,10\%}$ , white bars and  $L^{+,20\%}$ , striped white bars) in the presence of different shear stresses ( $\tau_0=0$  dyn cm<sup>-2</sup>,  $\tau_1=0.0146$  dyn cm<sup>-2</sup>, and  $\tau_2=0.146$  dyn cm<sup>-2</sup>) was assessed in both, the perfusion chamber and 96-well plates. b) The percentage of fluorescent myoblast cells with fluorescein isothiocyanate (FITC) labeled poly(L-Lysine) (PLL-FITC) ( $P^+$ , white bars) or PLL-FITC/polymethacrylic acid (PMA) ( $P^-$ , dark gray bars) coated 300 nm-diameter silica nanoparticles in the presence of  $\tau_0$ ,  $\tau_1$  and  $\tau_2$ . In a) and b), the threshold for the cell population testing positive for uptake/association with the fluorescent drug carriers has been chosen above the cells only control

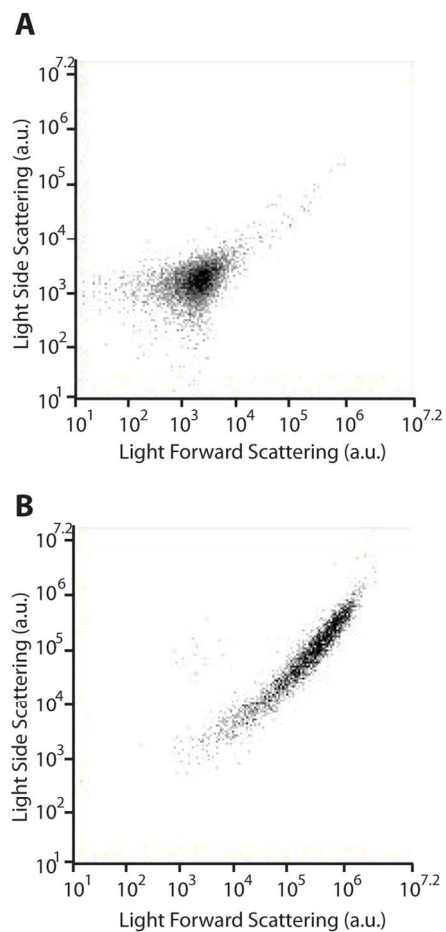

**Figure S2.** Flow cytometry dot plot of 300 nm-diameter silica nanoparticles coated with fluorescein isothiocyanate (FITC) labeled poly(L-Lysine) (PLL-FITC) ( $P^+$ ) (a) and PLL-FITC/polymethacrylic acid (PMA) ( $P^-$ ) (b).

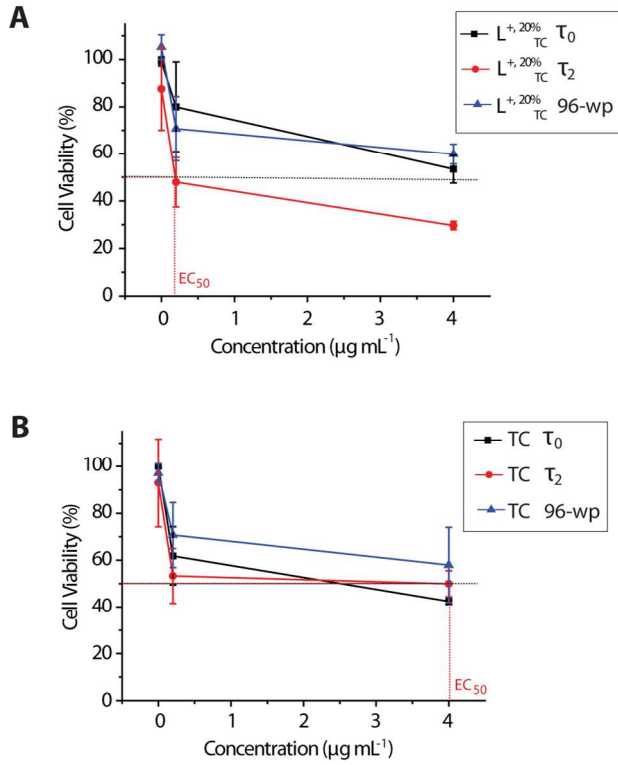

**Figure S3.** Dose-response curve of myoblast cells measured after 24 h after 30 min exposure to  $L^{+,20\%}$  or  $L^{+,20\%}$  loaded different concentrations of Thiocoraline (TC) ( $c_1 = 0.2 \mu\text{g mL}^{-1}$  and  $c_2 = 4 \mu\text{g mL}^{-1}$ ) (a) or free TC in the same concentration (b) in the presence of  $\tau_0$  and  $\tau_2$  in both, the perfusion chamber and the 96-well plates (96-wp). The results have been normalized to cells exposed to cell medium under static conditions in the perfusion chamber.

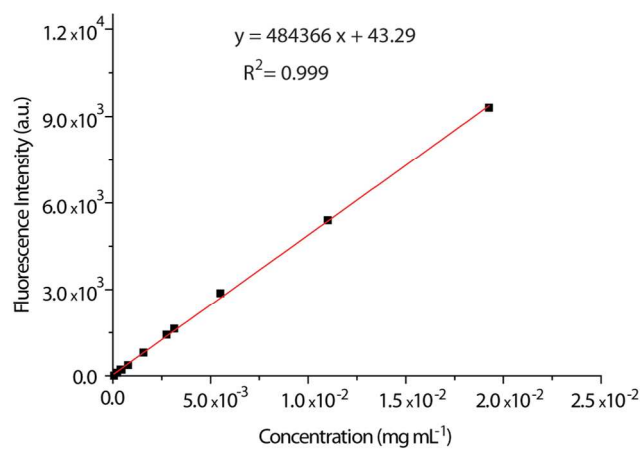

**Figure S4.** Fluorescence calibration curve for Thiocoraline (TC) in water. Different concentrations of TC were excited at a wavelength of 365 nm and the fluorescence intensity was recorded at an emission wavelength of 547 nm.
